# Supplementary material for: Synthesis of nitrogen and terbium co-doped TiO2nanocrystals with enhanced photocatalytic activity for AO7 degradation under visible-light radiation
Source: Royal Society of Chemistry journal article supplement (doi:10.1039/d2nj00817c), 2022-01-01
Supplement: d2nj00817c1.pdf [file d2nj00817c1.pdf]

## Supporting Information

### Synthesis of nitrogen and terbium co-doped TiO<sub>2</sub> nanocrystals with enhanced photocatalytic activity for AO7 degradation under visible light radiation

Yunfei Ma<sup>a,b ‡</sup>, Wenhui Yue<sup>a,b ‡</sup>, Ziwei Ye<sup>\*a,b</sup> and Jinglong Zhang<sup>\*a,b</sup>

<sup>a</sup> Shanghai Engineering Research Center for Multi-media Environmental Catalysis and Resource Utilization

<sup>b</sup> Key Laboratory for Advanced Materials, School of Chemistry and Molecular Engineering, East China University of Science & Technology, Shanghai 200237, China

E-mail: yeziwei@ecust.edu.cn

E-mail: jlzhang@ecust.edu.cn

<sup>‡</sup> These authors contributed equally to this work.

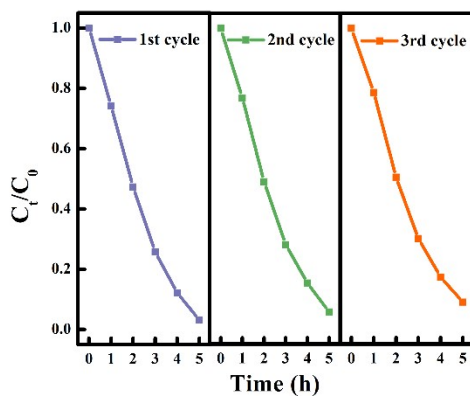

Figure S1. Cyclic test showing that 1.0Tb-N-TiO<sub>2</sub> remained stable for a prolonged period of 15 hours (three cycles).

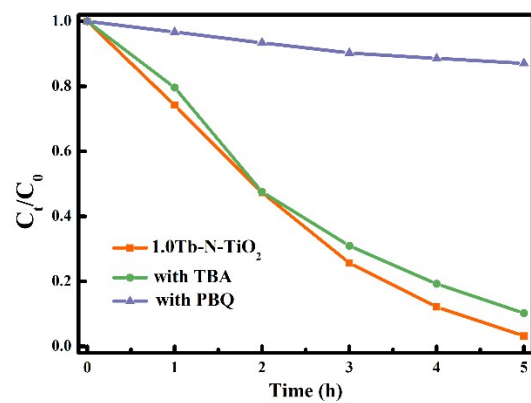

Figure S2. Plots illustrating the degradation of AO7 in the presence of benzoquinone (PBQ) and tert-butyl alcohol (TBA).
